# Supplementary material for: Detection of structural mosaicism from targeted and whole-genome sequencing data
Source: PubMed Central journal article supplement (PMC5630034; doi:10.1101/gr.212373.116), 2017-10
Supplement: supp_gr.212373.116_Supplemental_Fig_S2.pdf [file supp_gr.212373.116_Supplemental_Fig_S2.pdf]

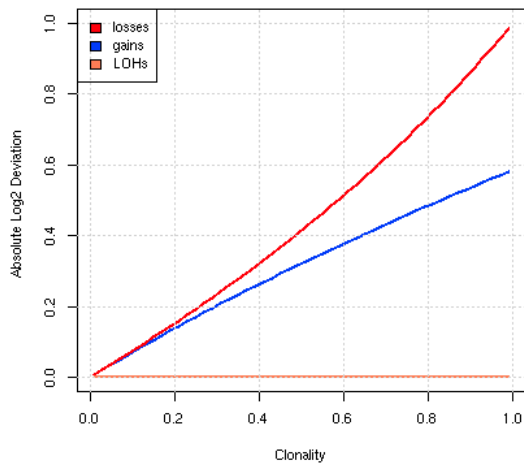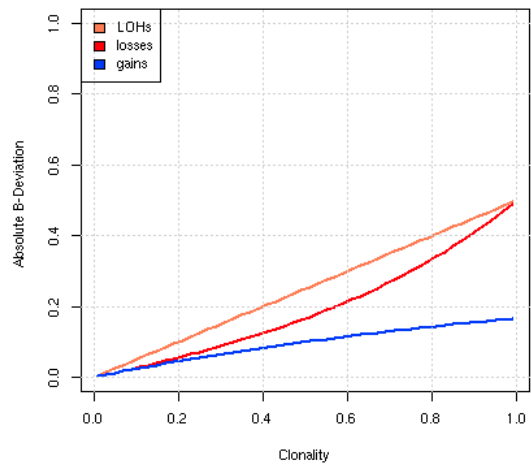

**Supplementary Figure 2: Relationship between Clonality and Metrics:** The relationship between clonality and measured metrics ( $C_{dev}$  and  $B_{dev}$ ) indicates that while LOH events result in no deviation of  $C_{dev}$ , gains have the smallest deflection of  $B_{dev}$  compared to other events of a given clonality.
