# Supplementary material for: Detection of structural mosaicism from targeted and whole-genome sequencing data
Source: PubMed Central journal article supplement (PMC5630034; doi:10.1101/gr.212373.116), 2017-10
Supplement: supp_gr.212373.116_Supplemental_Fig_S7.pdf [file supp_gr.212373.116_Supplemental_Fig_S7.pdf]

effect of average on BAF variance

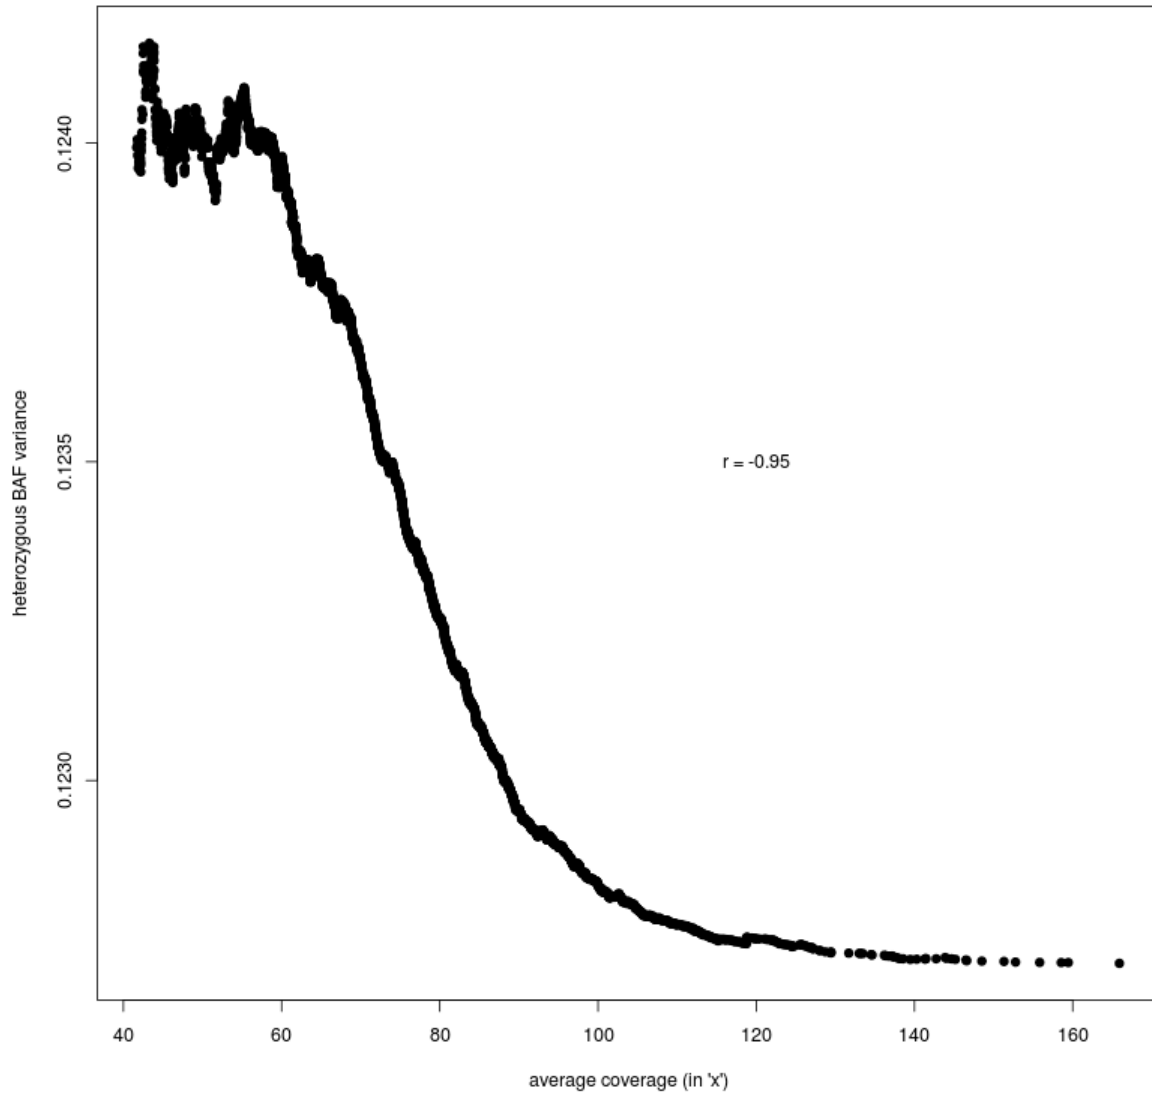

Supplementary Figure 7: The effect of average coverage on BAF variance.
