# Supplementary material for: Detection of structural mosaicism from targeted and whole-genome sequencing data
Source: PubMed Central journal article supplement (PMC5630034; doi:10.1101/gr.212373.116), 2017-10
Supplement: supp_gr.212373.116_Supplemental_Fig_S11.pdf [file supp_gr.212373.116_Supplemental_Fig_S11.pdf]

# DecipherID 259003

exome blood

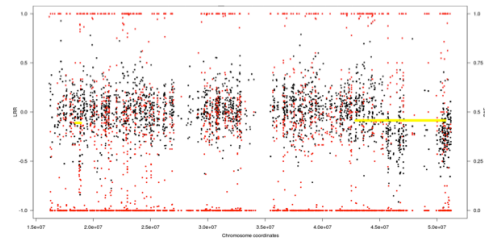

SNP saliva

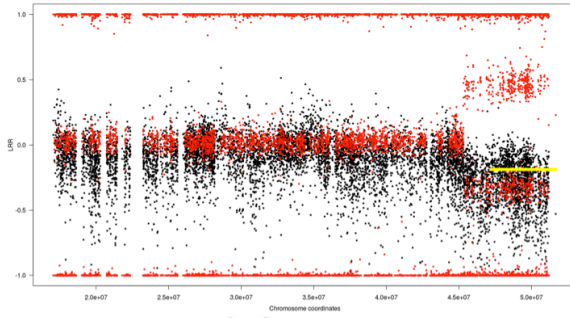

SNP blood

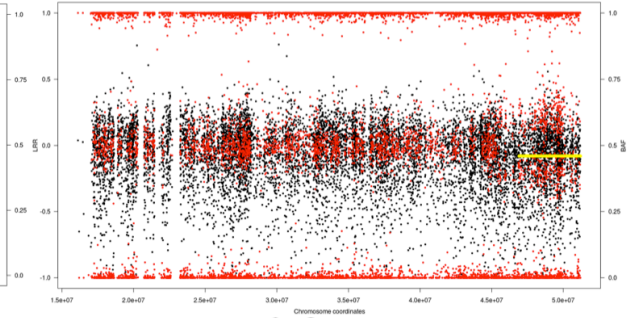

aCGH saliva

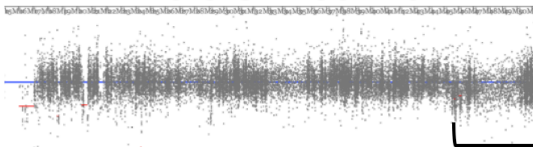

aCGH blood

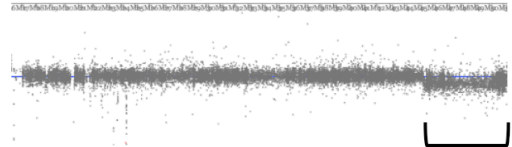

Supplementary Figure 11: SNP-chip validation of sample 259003
