# Supplementary material for: Detection of structural mosaicism from targeted and whole-genome sequencing data
Source: PubMed Central journal article supplement (PMC5630034; doi:10.1101/gr.212373.116), 2017-10
Supplement: supp_gr.212373.116_Supplemental_Fig_S14.pdf [file supp_gr.212373.116_Supplemental_Fig_S14.pdf]

# DecipherID 260462

exome saliva

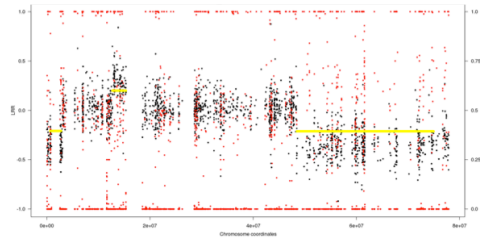

SNP saliva

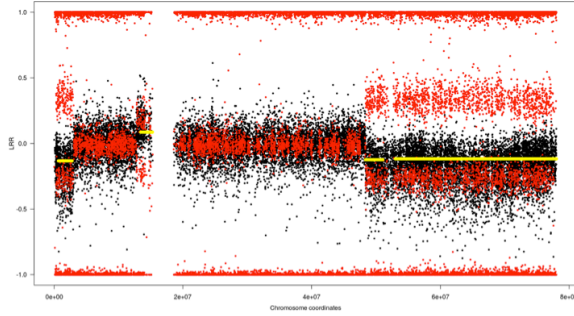

SNP blood

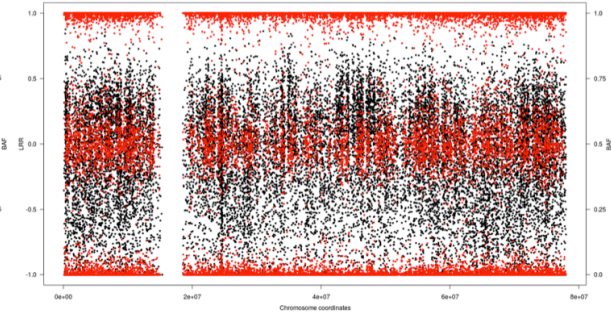

aCGH saliva

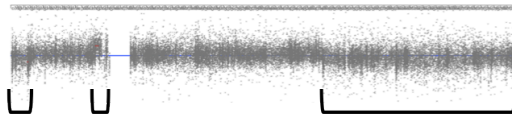

aCGH blood

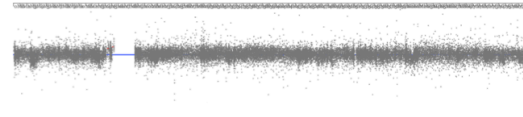

Supplementary Figure 14: SNP-chip validation of sample 260462
