# Supplementary material for: Detection of structural mosaicism from targeted and whole-genome sequencing data
Source: PubMed Central journal article supplement (PMC5630034; doi:10.1101/gr.212373.116), 2017-10
Supplement: supp_gr.212373.116_Supplemental_Fig_S16.pdf [file supp_gr.212373.116_Supplemental_Fig_S16.pdf]

# DecipherID 274396

## exome saliva

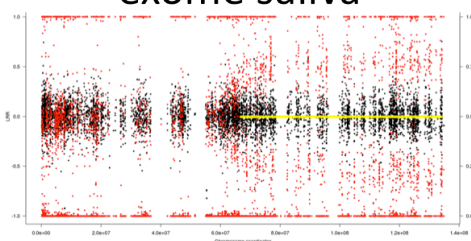

## SNP saliva

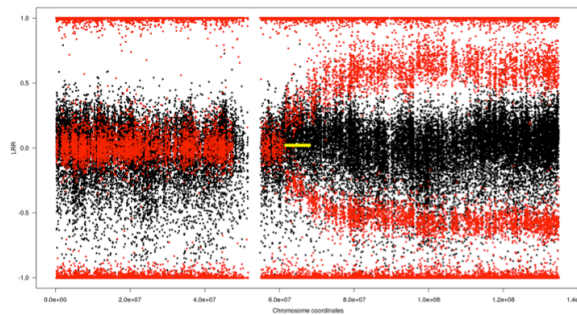

## SNP blood

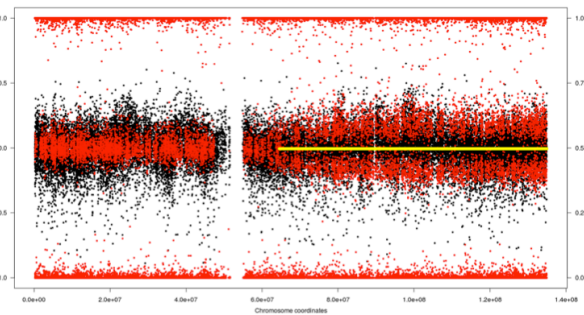

Supplementary Figure 16: SNP-chip validation of sample 274396
