# Supplementary material for: Detection of structural mosaicism from targeted and whole-genome sequencing data
Source: PubMed Central journal article supplement (PMC5630034; doi:10.1101/gr.212373.116), 2017-10
Supplement: supp_gr.212373.116_Supplemental_Fig_S17.pdf [file supp_gr.212373.116_Supplemental_Fig_S17.pdf]

DecipherID 258956 detected *post hoc*  
exome blood

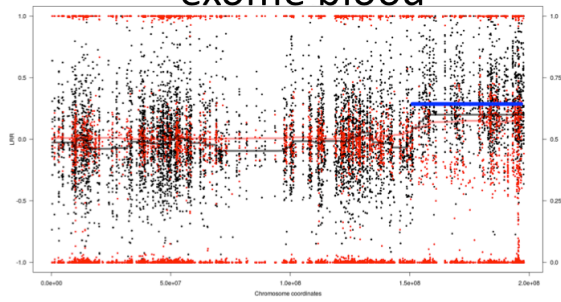

exome blood

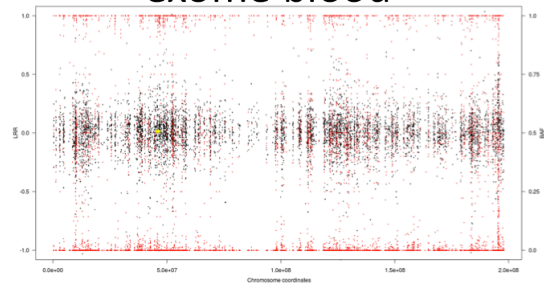

SNP saliva

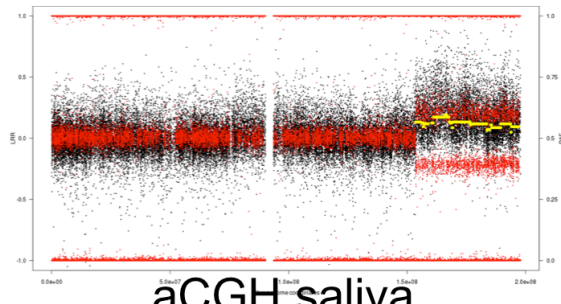

SNP blood

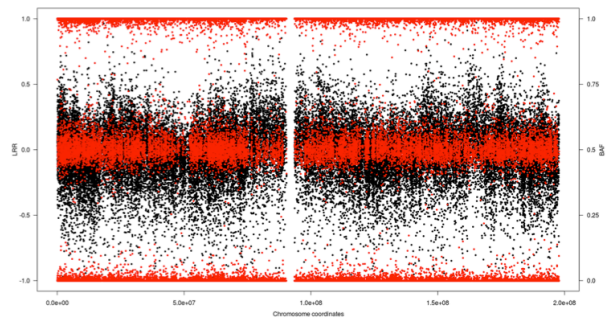

aCGH saliva

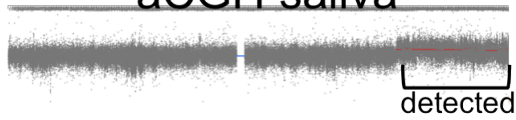

Supplementary Figure 17: Post-hoc detection of sample 258956: Initially undetected in exome (done on blood), SNP-chip results showed that the event is absent in blood. Post-hoc detection, by exome, of saliva successfully detected the event. The Mscore of this detection was 19.
