# Supplementary material for: Detection of structural mosaicism from targeted and whole-genome sequencing data
Source: PubMed Central journal article supplement (PMC5630034; doi:10.1101/gr.212373.116), 2017-10
Supplement: supp_gr.212373.116_Supplemental_Fig_S19.pdf [file supp_gr.212373.116_Supplemental_Fig_S19.pdf]

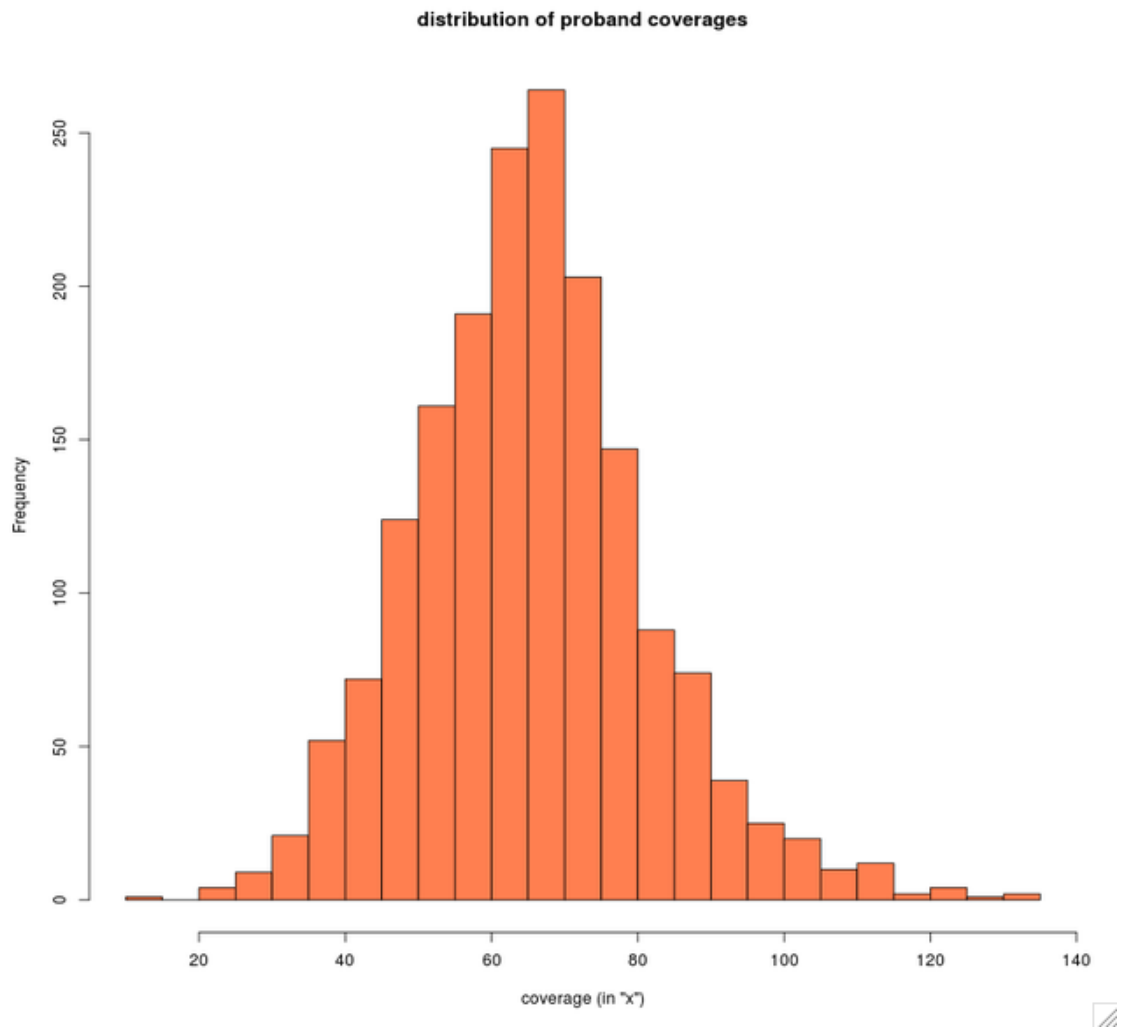

**Supplementary Figure 19: Distribution of proband coverages:** We measured coverage in exomes using samtools flagstat to generate the number QC-passed and mapped reads without read-duplicates, multiplied this by the sequence read length (75) and divided by the number of bases targeted in the exome, 90 Mb. The mean exome coverage was 69x.
