# Supplementary material for: Detection of structural mosaicism from targeted and whole-genome sequencing data
Source: PubMed Central journal article supplement (PMC5630034; doi:10.1101/gr.212373.116), 2017-10
Supplement: supp_gr.212373.116_Supplemental_Fig_S25.pdf [file supp_gr.212373.116_Supplemental_Fig_S25.pdf]

Partitioning True Positive Log2Likelihoods By Clonality, Type, and Simulated Size

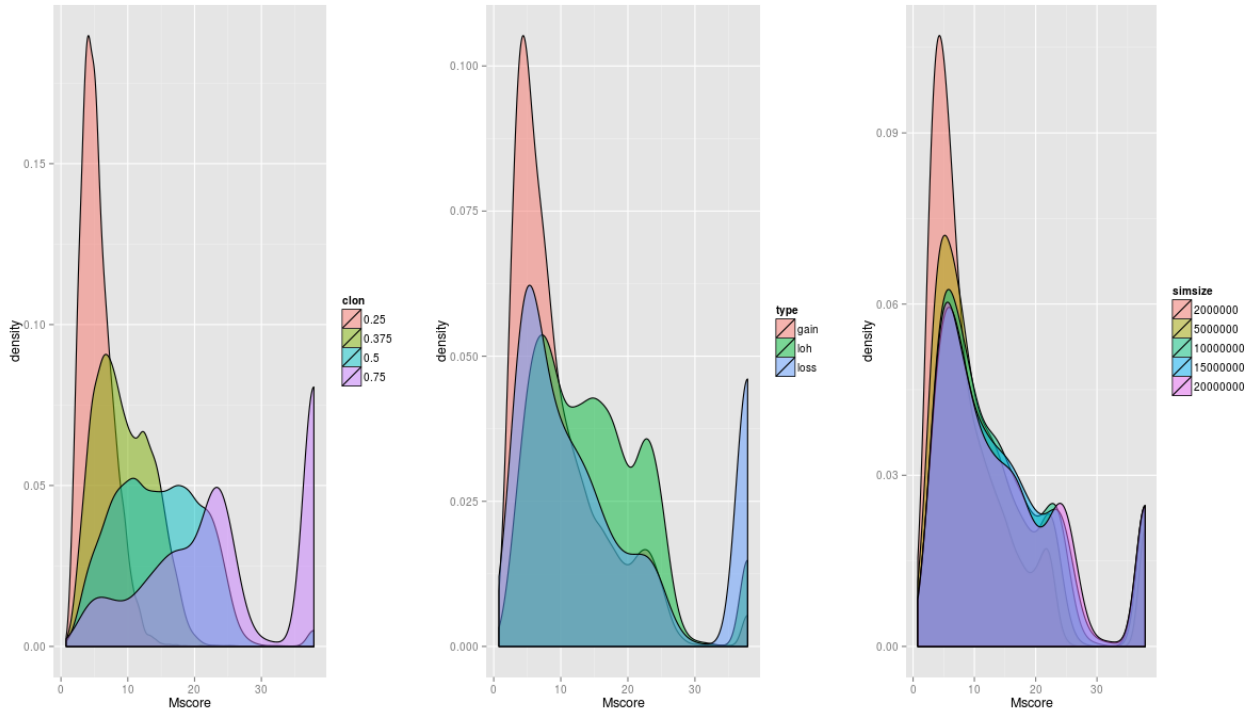

**Supplementary Figure 25: Stratifying Mscore by simulation clonality, type, and size: We stratified the true positive events by Mscore to better define the relationship between Mscore thresholds and simulated mosaic events. The mosaic events with the lowest Mscore were those at the lowest clonality (left side of left graph).**
