# Supplementary material for: Detection of structural mosaicism from targeted and whole-genome sequencing data
Source: Genome Res. 2017 Oct;27(10):1704–14. doi: 10.1101/gr.212373.116 (PMC5630034; doi:10.1101/gr.212373.116)
Supplement: Supplemental Material [file supp_gr.212373.116_Supplemental_Table_S6.docx]

Supplementary Table 6: Functions to Prepare Simulations

| Simulation metrics | Normal | Loss | Gain | LOH |
| --- | --- | --- | --- | --- |
| LRR | 0 |  |  | 0 |
| Simulated Read Depth (SDP) |  |  |  |  |
| B-allele frequency  (Bdev) |  |  |  |  |

**Legend:**

*:* Clonality as in proportion of cells with abnormality

*:* Median read depth (after quality filtering) at position *i*

*S*: Scaling factor so that

SDPi : Simulated Read Depth at position *i*

p: Proportion of reads with alternative allele at position *i*
